# Supplementary material for: Exploiting the network architecture of thiol–ene photo-crosslinked poly(ε-caprolactone) towards tailorable materials for light-based 3D-printing
Source: Royal Society of Chemistry journal article supplement (doi:10.1039/d3py00381g), 2023-01-01
Supplement: d3py00381g1.pdf [file d3py00381g1.pdf]

## Supporting information

### **Exploiting the network architecture of thiol-ene photo-crosslinked poly( $\epsilon$ -caprolactone) towards tailorable materials for light-based 3D-printing**

*Astrid Quaak, Quinten Thijssen and Sandra Van Vlierberghe*

## Chemical characterization via $^1\text{H}$ -NMR spectroscopy

### 1. Determination of the molar mass for E-PCL precursors, via $^1\text{H}$ -NMR spectroscopy

**Table S1.** The molar mass ( $M_n$ ) is represented for each E-PCL precursor, obtained through  $^1\text{H}$ -NMR spectroscopy. The molar mass was calculated based on the  $\text{H}_\epsilon$  (next to the urethane bonds) to PCL (repeating unit) ratio, as listed

|          | Integration $\text{H}_\epsilon$ next to urethane (3.78 ppm) | Integration PCL (4.1 ppm) | Number of repeating units | Molar mass ( $\text{g}\cdot\text{mol}^{-1}$ ) |
|----------|-------------------------------------------------------------|---------------------------|---------------------------|-----------------------------------------------|
| E-PCL(2) | 4                                                           | 139.09                    | 67                        | 8000                                          |
| E-PCL(3) | 6                                                           | 136.04                    | 68                        | 7900                                          |
| E-PCL(4) | 8                                                           | 132.57                    | 66                        | 7700                                          |

in the table.

### 2. Determination of the alkene content and degree of substitution for E-PCL precursors, via $^1\text{H}$ -NMR spectroscopy with dimethyl terephthalate (DMT) as internal standard

|          | Molar mass ( $\text{g}\cdot\text{mol}^{-1}$ ) | E-PCL mass (mg) | DMT mass (mg) | Integration at 5.8 ppm | Integration at 5.2 ppm | Alkene content ( $\text{mol}\cdot\text{g}^{-1}$ ) | Degree of substitution (%) |
|----------|-----------------------------------------------|-----------------|---------------|------------------------|------------------------|---------------------------------------------------|----------------------------|
| E-PCL(2) | 8000                                          | 10.4            | 9.8           | 11.95                  | 22.93                  | $2.26\cdot 10^{-4}$                               | 91                         |
| E-PCL(3) | 7900                                          | 10.4            | 10.1          | 19.65                  | 36.98                  | $3.78\cdot 10^{-4}$                               | 99                         |
| E-PCL(4) | 7700                                          | 10.92           | 10.11         | 26.82                  | 50.11                  | $4.89\cdot 10^{-4}$                               | 94                         |

**Table S2.** The alkene content and degree of substitution values are represented, for each E-PCL precursor, obtained through  $^1\text{H}$ -NMR spectroscopy with DMT as an internal standard.

### 3. Demonstrating successful synthesis of the E-PCL precursors

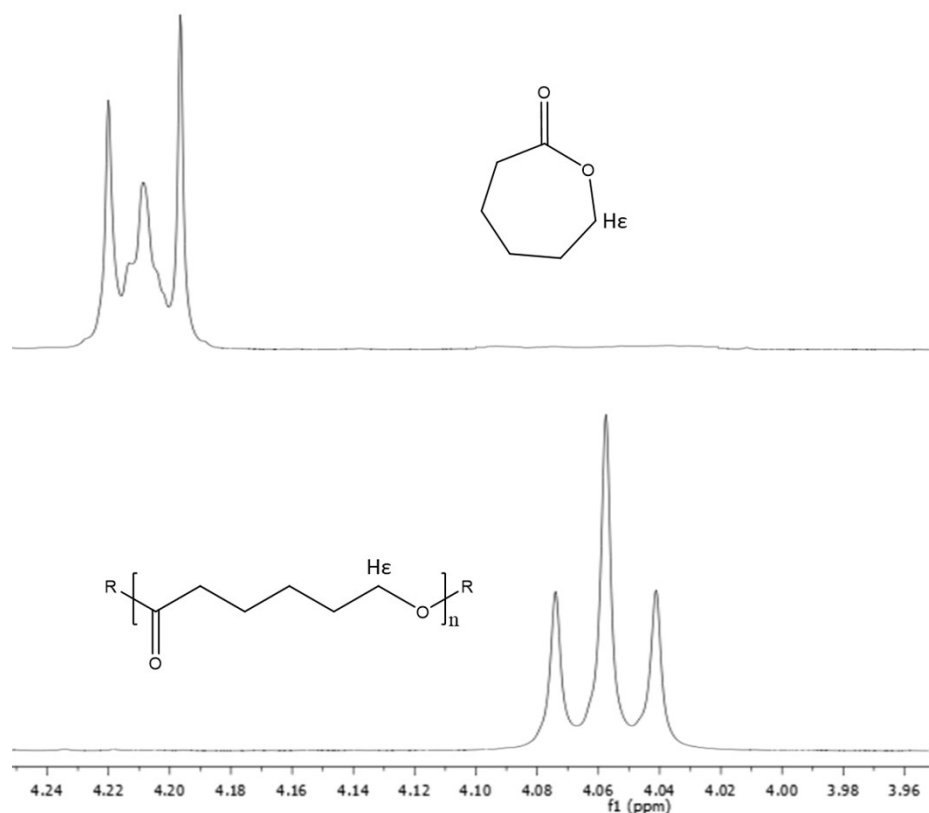

**Figure S1.**  $^1\text{H}$ -NMR spectrum displaying the conversion of the  $\text{H}_\epsilon$  protons from  $\epsilon$ -caprolactone monomers (4.21 ppm) into those of the synthesized PCL polymer (4.06 ppm).

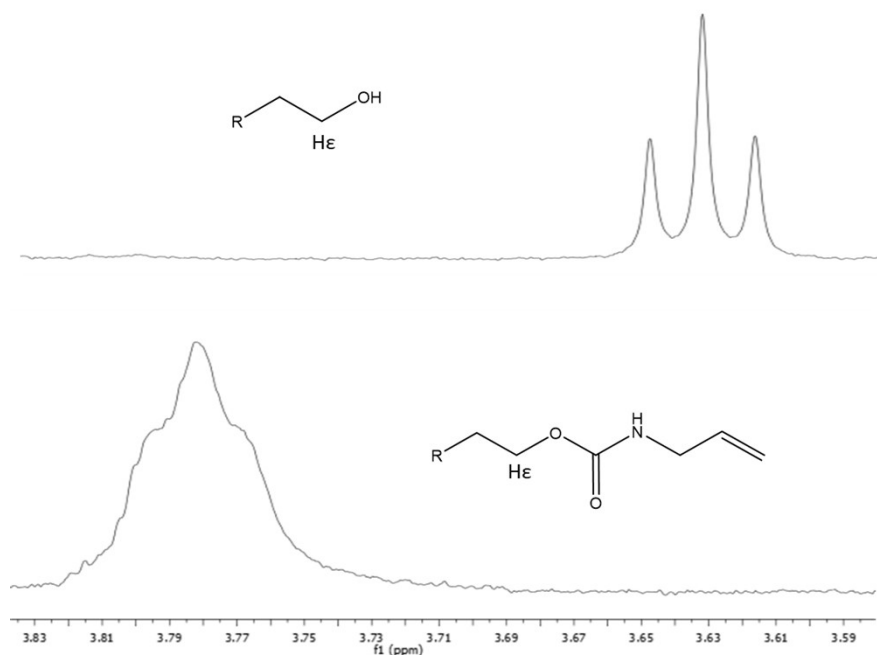

**Figure S2.**  $^1\text{H}$ -NMR spectrum displaying the conversion of  $\text{H}_\epsilon$  protons next to a hydroxyl group (3.64 ppm) into those next to a urethane bond (3.78 ppm).

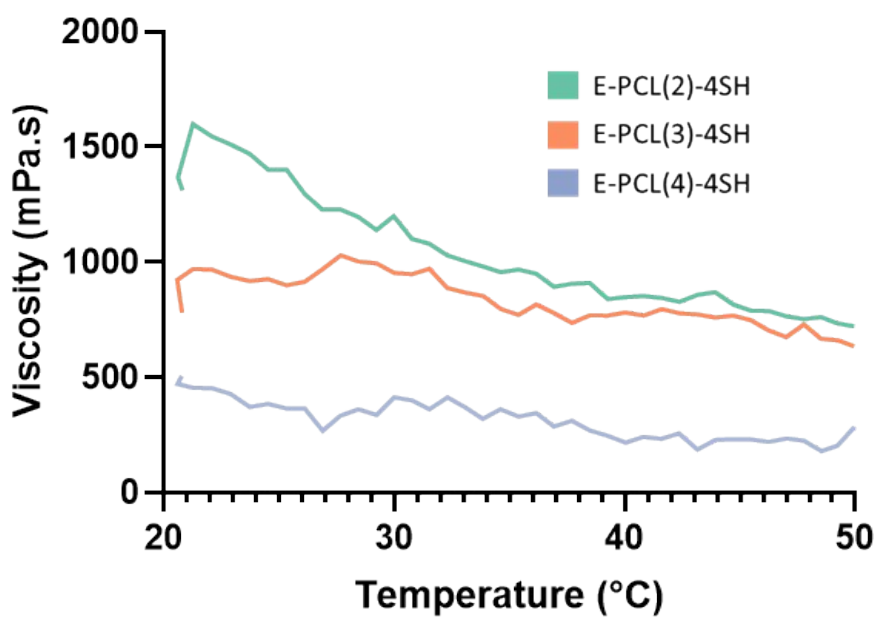

#### Optimization of photo-crosslinkable E-PCL resins for DLP printing

**Figure S3.** Viscosity measurements in function of temperature for E-PCL(2)-4SH, E-PCL(3)-4SH and E-PCL(4)-4SH photo-crosslinkable resins in NMP, with a concentration of 40, 50 and 50 w/w%, respectively.

#### Stability tests on photo-crosslinkable E-PCL resins to determine shelf life

**Table S3.** Stability tests performed on E-PCL(2)-4SH, E-PCL(3)-4SH and E-PCL(4)-4SH photo-crosslinkable resins in NMP, with a concentration of 40, 50 and 50 w/w%, respectively. The resins were stored under argon, in the dark and at different temperatures (i.e., 4°C, 20°C and 40°C) in parallel. During 7 days, the alkene content was determined for each resin, through <sup>1</sup>H-NMR spectroscopy with DMT as internal standard.

|              | Day   | Stored at 4°C (mol.g <sup>-1</sup> ) | Stored at 20°C (mol.g <sup>-1</sup> ) | Stored at 40°C (mol.g <sup>-1</sup> ) |
|--------------|-------|--------------------------------------|---------------------------------------|---------------------------------------|
| E-PCL(2)-4SH | Start | 2.26*10 <sup>-4</sup>                | 2.26*10 <sup>-4</sup>                 | 2.26*10 <sup>-4</sup>                 |
|              | 1     | 2.28*10 <sup>-4</sup>                | 2.27*10 <sup>-4</sup>                 | 2.26*10 <sup>-4</sup>                 |
|              | 3     | 2.27*10 <sup>-4</sup>                | 2.25*10 <sup>-4</sup>                 | 2.26*10 <sup>-4</sup>                 |
|              | 5     | 2.24*10 <sup>-4</sup>                | 2.25*10 <sup>-4</sup>                 | 2.24*10 <sup>-4</sup>                 |
|              | 7     | 2.21*10 <sup>-4</sup>                | 2.21*10 <sup>-4</sup>                 | 2.20*10 <sup>-4</sup>                 |
| E-PCL(3)-4SH | Start | 3.78*10 <sup>-4</sup>                | 3.78*10 <sup>-4</sup>                 | 3.78*10 <sup>-4</sup>                 |
|              | 1     | 3.80*10 <sup>-4</sup>                | 3.77*10 <sup>-4</sup>                 | 3.75*10 <sup>-4</sup>                 |
|              | 3     | 3.81*10 <sup>-4</sup>                | 3.74*10 <sup>-4</sup>                 | 3.75*10 <sup>-4</sup>                 |
|              | 5     | 3.73*10 <sup>-4</sup>                | 3.72*10 <sup>-4</sup>                 | 3.71*10 <sup>-4</sup>                 |
|              | 7     | 3.71*10 <sup>-4</sup>                | 3.72*10 <sup>-4</sup>                 | 3.70*10 <sup>-4</sup>                 |
| E-PCL(4)-4SH | Start | 4.89*10 <sup>-4</sup>                | 4.89*10 <sup>-4</sup>                 | 4.89*10 <sup>-4</sup>                 |
|              | 1     | 4.80*10 <sup>-4</sup>                | 4.79*10 <sup>-4</sup>                 | 4.77*10 <sup>-4</sup>                 |
|              | 3     | 4.49*10 <sup>-4</sup>                | 4.39*10 <sup>-4</sup>                 | 4.31*10 <sup>-4</sup>                 |
|              | 5     | 4.37*10 <sup>-4</sup>                | 4.29*10 <sup>-4</sup>                 | 4.25*10 <sup>-4</sup>                 |
|              | 7     | 4.25*10 <sup>-4</sup>                | 4.08*10 <sup>-4</sup>                 | 3.98*10 <sup>-4</sup>                 |
